# Supplementary material
Source: Springer Nature journal article supplement (https://www.springermedizin.de/resource/supplementary/12939_2013_536_MOESM2_ESM.pdf/9551176)

2002

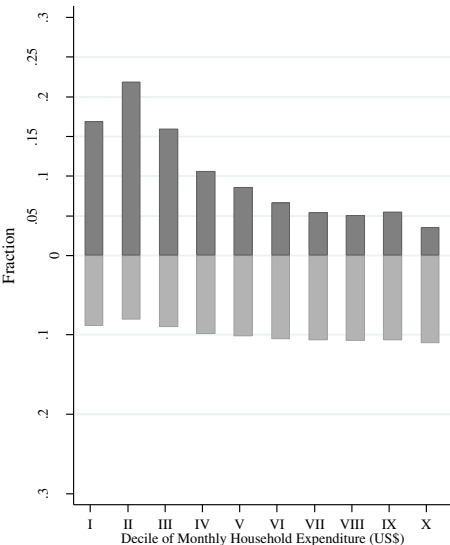

2010

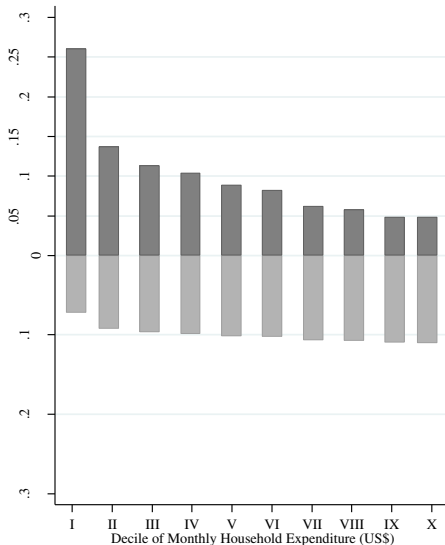

Non Indigenous Indigenous

Non Indigenous Indigenous

Supplement: MOESM2 [file 9551176]
